# Supplementary material
Source: Springer Nature journal article supplement (https://www.springermedizin.de/resource/supplementary/12885_2010_2731_MOESM1_ESM.pdf/9461890)

**Positive**

**Negative**

**pFOXO1**

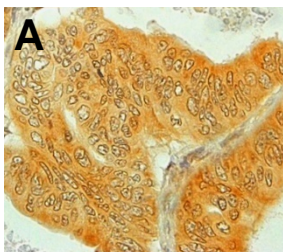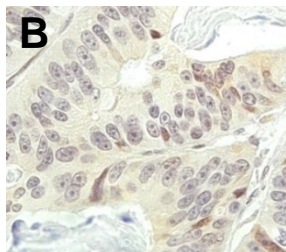

**CD34**

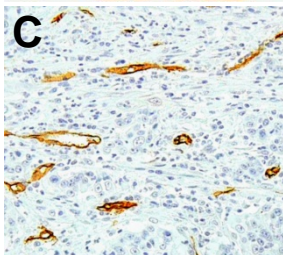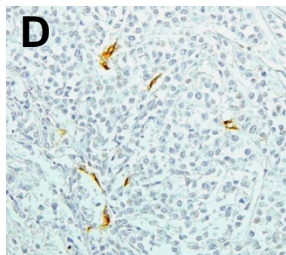

**HIF-1**

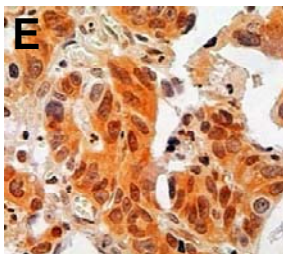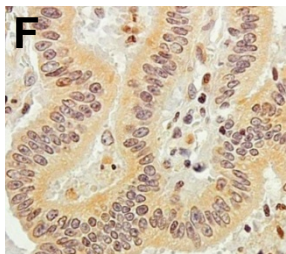

**VEGF**

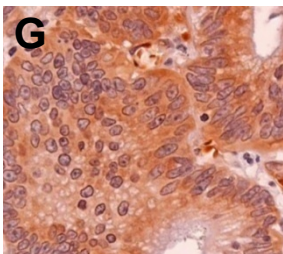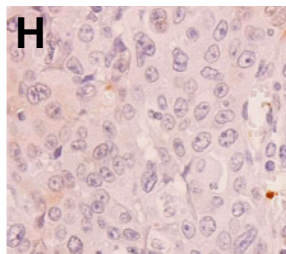

Supplement: MOESM1 [file 9461890]
